# Supplementary material
Source: publisher figshare collection journal article supplement (https://gsapubs.figshare.com/ndownloader/files/28496577)
Supplement: Supplementary file 1 [file 28496577]

## Sheet: Sheet2
SN17-02B				SN17-04A				SN17-06A				SN17-09A
pulse	eigenvalue	trend (°)	plunge (°)	pulse	eigenvalue	trend (°)	plunge (°)	pulse	eigenvalue	trend (°)	plunge (°)	pulse	eigenvalue	trend (°)	plunge (°)
1a	0.4337	157	1.9	1a	0.4167	357.2	16.5	1a	0.442	120	4.9	1a	0.4809	271.3	1.6
1b	0.4538	75.8	3.2	1b	0.4771	348.5	5.9					1b	0.4395	142.5	1.2
1c	0.416	255.5	9.9	2a	0.4423	54.2	17.3					1c	0.4729	296.3	2.3
				2b	0.4139	329.9	1.3					1d	0.4639	283.5	3.5
												2a	0.464	139.9	15.9
												2b	0.4283	261.4	11
												2c	0.467	281.9	10.7

## Sheet: G48940
Wils, K., et al., 2021, Earthquake doublet revealed by multiple pulses in lacustrine seismo-turbidites: Geology, v. 49, https://doi.org/10.1130/G48940.1
